# Supplementary material for: Management history can cause irreversible changes in agroecosystems: an experimental demonstration
Source: Research Square preprint supplement (doi:10.21203/rs.3.rs-4837518/v1), 2024-09-04
Supplement: Supplementary file 1 [file 6171d8794fd74ede052f2a8c.pdf]

Appendix for “Management history can cause  
irreversible changes in agroecosystems: an experimental  
demonstration”

Athmanathan Senthilnathan<sup>1,\*</sup> and Theresa Ong<sup>1</sup>

1. Dartmouth College, Department of Environmental Studies, Hanover, New Hampshire,  
USA.

\* Corresponding author; e-mail: athma.senthilnathan@dartmouth.edu

ORCID: 0000-0002-9665-8397

**A1: Hysteresis in the *Carpenter* model due to consumption rate**

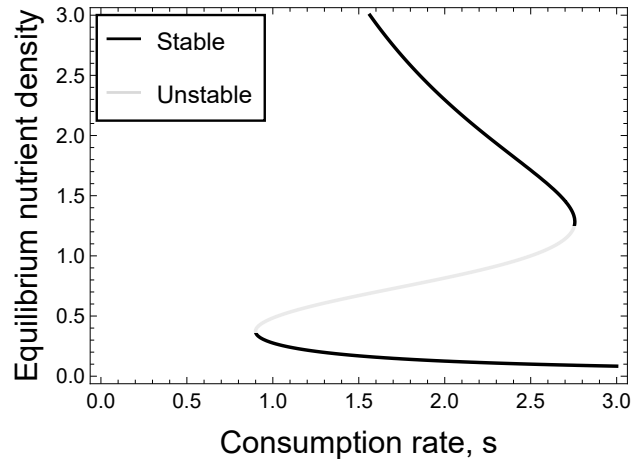

Figure A1: Hysteretic pattern for equation 2 with nutrient input rate  $a = 0.25$ , recycling rate  $r = 4.5$ , and source function parameters  $m = 1, q = 4$ .

## A2: Perturbations to infer unstable states

We planned to test for the presence of unstable states by perturbing the system at even inorganic and organic fertilization levels to test for sudden jumps between alternative stable states. It is a standard assumption in hysteresis studies that we observe system only at a stable state, here, that is our measurements at the end of a week after fertilization. Therefore, when we reached 50% inorganic and 50% organic fertilization in our experiment, soils from a subset of our forward and reverse replicates were mixed at a 1:1, 1:2, or 2:1 ratio in order to forcefully move the state of the system to lie in between the two alternative states. We further perturbed the system with  $a \pm 1/4$  change to fertilization and observe effects on state variables. We expected that the change in the direction and magnitude of state variables would allow us to infer whether the unstable states in our inferred bifurcation plots curves that are consistent with empirical results and dynamic rules (Fig. 3, 4). However, we had too few replicates and too few perturbation treatments to fully contrast the theoretical prediction with the data. We show the outcomes of the perturbations in Fig. [A2](#), [A3](#).

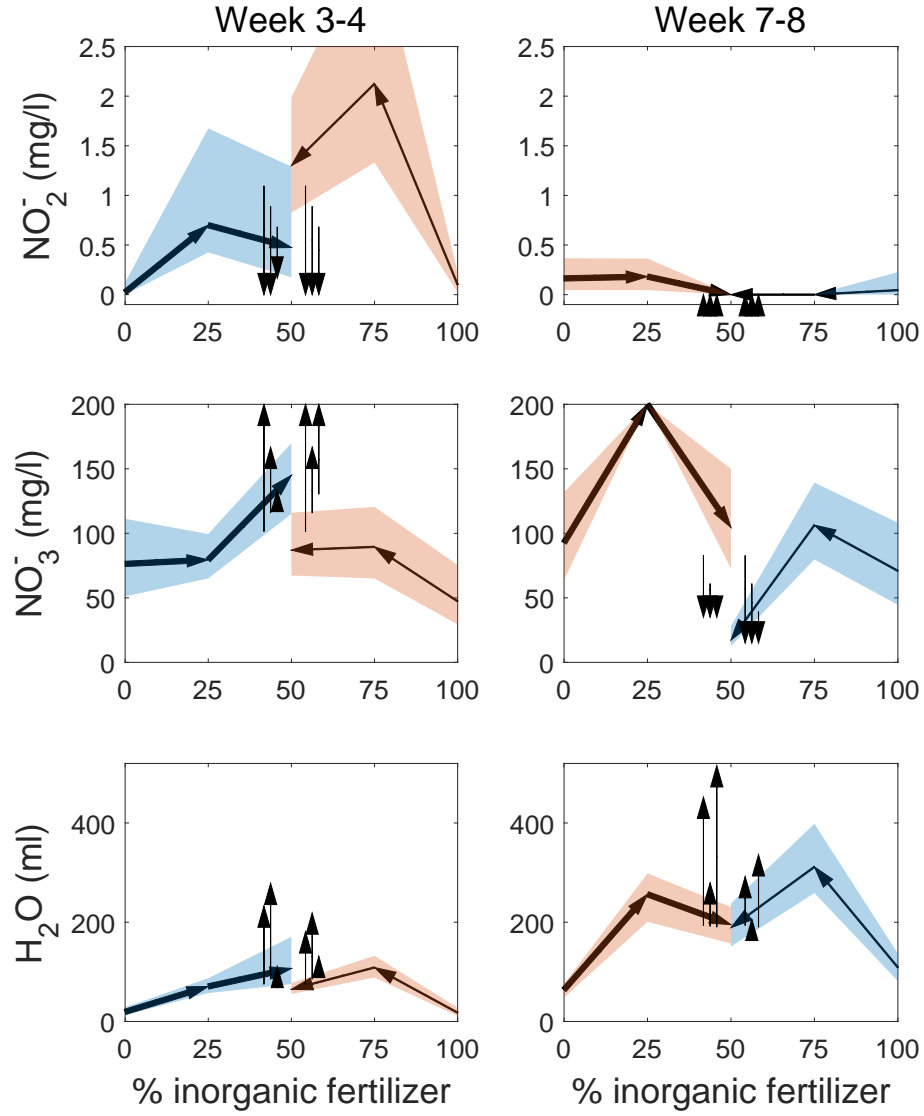

Figure A2: Perturbations suggest alternative stable states in flux measurements. All the arrows are formed by state variable measurements at the start and end of each week. The vertical arrows represent the perturbations and the outcome. The vertical arrows are the average of three replication for Week 3-4 and the average of two replications for Week 7-8.

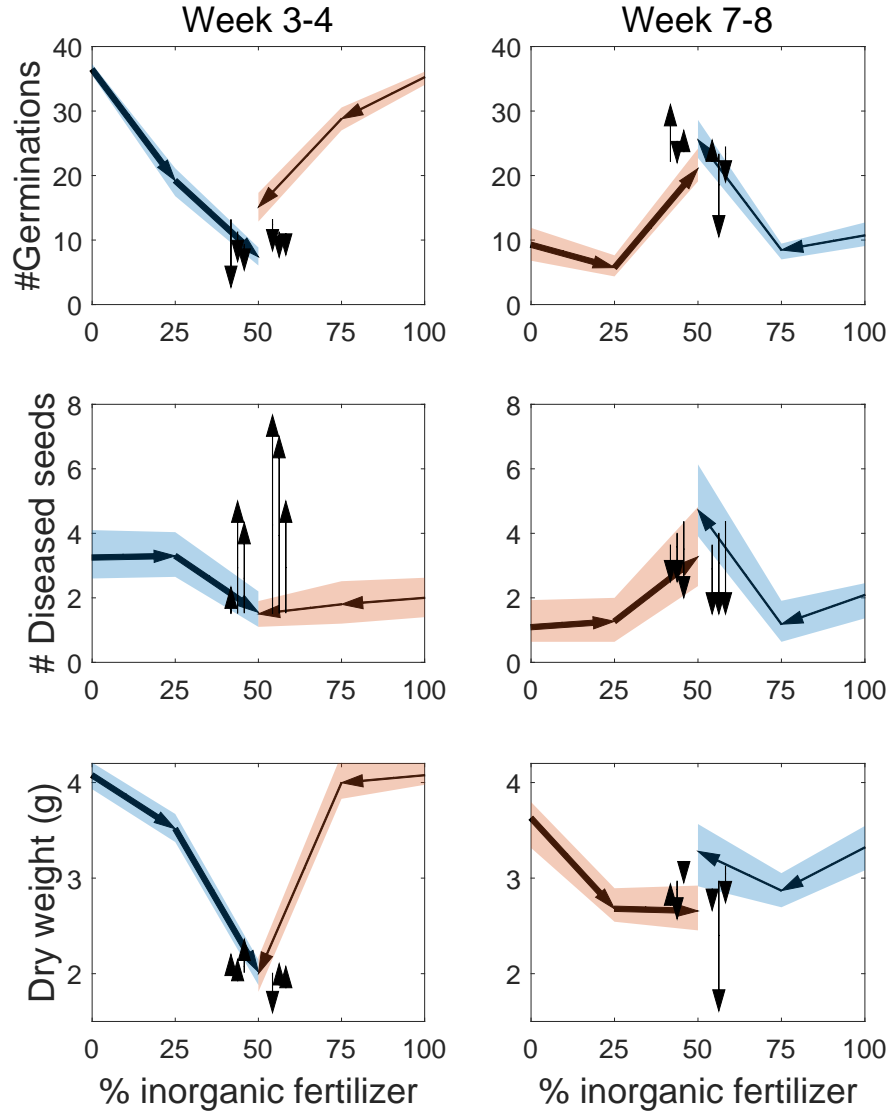

Figure A3: Perturbations suggest alternative stable states in fitness proxies. All the arrows are formed by state variable measurements at the start and end of each week. The vertical arrows represent the perturbations and the outcome. The vertical arrows are the average of three replication for Week 3-4 and the average of two replications for Week 7-8.



## A3: ANOVA tables

| ANOVA (all)        |         |      |          |       |        |
|--------------------|---------|------|----------|-------|--------|
| Source             | Sum Sq. | d.f. | Mean Sq. | F     | Prob>F |
| Fert.              | 15.841  | 4    | 3.9603   | 4.57  | 0.0014 |
| St. dir.           | 1.793   | 1    | 1.7932   | 2.07  | 0.1514 |
| Cur. dir.          | 6.149   | 1    | 6.1486   | 7.1   | 0.0082 |
| Fert.:St. dir.     | 11.42   | 4    | 2.855    | 3.3   | 0.0118 |
| Fert.:Cur. dir.    | 14.106  | 4    | 3.5265   | 4.07  | 0.0033 |
| St. dir.:Cur. dir. | 12.607  | 1    | 12.6071  | 14.56 | 0.0002 |
| Error              | 202.571 | 234  | 0.8657   |       |        |
| Total              | 291.645 | 249  |          |       |        |

  

| ANOVA (starting forward - ff vs fb) |         |      |          |      |        |
|-------------------------------------|---------|------|----------|------|--------|
| Source                              | Sum Sq. | d.f. | Mean Sq. | F    | Prob>F |
| Fert.                               | 1.8524  | 4    | 0.4631   | 1.17 | 0.329  |
| Dir.                                | 1.4335  | 1    | 1.43348  | 3.61 | 0.0598 |
| Fert.:Dir.                          | 2.0568  | 4    | 0.5142   | 1.3  | 0.2758 |
| Error                               | 45.6295 | 115  | 0.39678  |      |        |
| Total                               | 55      | 124  |          |      |        |

| ANOVA (starting backward - bf vs bb) |         |      |          |      |        |
|--------------------------------------|---------|------|----------|------|--------|
| Source                               | Sum Sq. | d.f. | Mean Sq. | F    | Prob>F |
| Fert.                                | 14.088  | 4    | 3.5219   | 2.75 | 0.0315 |
| Dir.                                 | 11.126  | 1    | 11.1263  | 8.69 | 0.0039 |
| Fert.:Dir.                           | 19.039  | 4    | 4.7598   | 3.72 | 0.007  |
| Error                                | 147.265 | 115  | 1.2806   |      |        |
| Total                                | 226.2   | 124  |          |      |        |

  

| ANOVA (ff vs bb) |         |      |          |      |        |
|------------------|---------|------|----------|------|--------|
| Source           | Sum Sq. | d.f. | Mean Sq. | F    | Prob>F |
| Fert.            | 25.398  | 4    | 6.34959  | 5.11 | 0.0007 |
| Dir.             | 8.995   | 1    | 8.99459  | 7.25 | 0.0079 |
| Fert.:Dir.       | 32.343  | 4    | 8.08571  | 6.51 | 0.0001 |
| Error            | 191.185 | 154  | 1.24146  |      |        |
| Total            | 273.004 | 163  |          |      |        |

| ANOVA (ff vs bf) |         |      |          |      |        |
|------------------|---------|------|----------|------|--------|
| Source           | Sum Sq. | d.f. | Mean Sq. | F    | Prob>F |
| Fert.            | 2.9859  | 4    | 0.74646  | 1.83 | 0.1276 |
| Dir.             | 0.8063  | 1    | 0.80633  | 1.98 | 0.1623 |
| Fert.:Dir.       | 2.2763  | 4    | 0.56908  | 1.4  | 0.2398 |
| Error            | 46.8841 | 115  | 0.40769  |      |        |
| Total            | 55.4829 | 124  |          |      |        |

  

| ANOVA (fb vs bb) |         |      |          |       |        |
|------------------|---------|------|----------|-------|--------|
| Source           | Sum Sq. | d.f. | Mean Sq. | F     | Prob>F |
| Fert.            | 20.463  | 4    | 5.1158   | 4.03  | 0.0043 |
| Dir.             | 13.213  | 1    | 13.2127  | 10.41 | 0.0016 |
| Fert.:Dir.       | 21.506  | 4    | 5.3764   | 4.23  | 0.0031 |
| Error            | 146.01  | 115  | 1.2697   |       |        |
| Total            | 228.241 | 124  |          |       |        |

| ANOVA (fb vs bf) |         |      |          |      |        |
|------------------|---------|------|----------|------|--------|
| Source           | Sum Sq. | d.f. | Mean Sq. | F    | Prob>F |
| Fert.            | 0.11898 | 4    | 0.02975  | 1.32 | 0.2692 |
| Dir.             | 0.06689 | 1    | 0.06689  | 2.97 | 0.0886 |
| Fert.:Dir.       | 0.15754 | 4    | 0.03938  | 1.75 | 0.1475 |
| Error            | 1.70909 | 76   | 0.02249  |      |        |
| Total            | 2.175   | 85   |          |      |        |

Figure A4: ANOVA tables for nitrite leaching data. In the two-letter abbreviations, the first letter indicates starting direction and the second letter indicates the direction of transition, where f=forward and b=backward.

| ANOVA (all)        |          |       |          |       |        |
|--------------------|----------|-------|----------|-------|--------|
| Source             | Sum Sq.  | d. f. | Mean Sq. | F     | Prob>F |
| Fert.              | 65950.6  | 4     | 16487.6  | 5.41  | 0.0004 |
| St. dir.           | 46438.2  | 1     | 46438.2  | 15.23 | 0.0001 |
| Cur. dir.          | 4797.9   | 1     | 4797.9   | 1.57  | 0.2109 |
| Fert.:St. dir.     | 109190.3 | 4     | 27297.6  | 8.95  | 0      |
| Fert.:Cur. dir.    | 200594.2 | 4     | 50148.5  | 16.45 | 0      |
| St. dir.:Cur. dir. | 39291.3  | 1     | 39291.3  | 12.89 | 0.0004 |
| Error              | 713322.2 | 234   | 3048.4   |       |        |
| Total              | 1112200  | 249   |          |       |        |

| ANOVA (starting forward - ff vs fb) |          |       |          |      |        |
|-------------------------------------|----------|-------|----------|------|--------|
| Source                              | Sum Sq.  | d. f. | Mean Sq. | F    | Prob>F |
| Fert.                               | 76949.9  | 4     | 19237.5  | 6.58 | 0.0001 |
| Dir.                                | 66936.9  | 1     | 66936.9  | 22.9 | 0      |
| Fert.:Dir.                          | 59322.3  | 4     | 14830.6  | 5.07 | 0.0008 |
| Error                               | 336079.7 | 115   | 2922.4   |      |        |
| Total                               | 549868   | 124   |          |      |        |

| ANOVA (starting backward - bf vs bb) |          |       |          |       |        |
|--------------------------------------|----------|-------|----------|-------|--------|
| Source                               | Sum Sq.  | d. f. | Mean Sq. | F     | Prob>F |
| Fert.                                | 151215.2 | 4     | 37803.8  | 13.39 | 0      |
| Dir.                                 | 133.5    | 1     | 133.5    | 0.05  | 0.8282 |
| Fert.:Dir.                           | 102493.6 | 4     | 25623.4  | 9.08  | 0      |
| Error                                | 324616.8 | 115   | 2822.8   |       |        |
| Total                                | 562295.2 | 124   |          |       |        |

| ANOVA (ff vs bb) |          |       |          |      |        |
|------------------|----------|-------|----------|------|--------|
| Source           | Sum Sq.  | d. f. | Mean Sq. | F    | Prob>F |
| Fert.            | 82183.5  | 4     | 20545.9  | 6.16 | 0.0001 |
| Dir.             | 22932.1  | 1     | 22932.1  | 6.88 | 0.0096 |
| Fert.:Dir.       | 41484.6  | 4     | 10371.2  | 3.11 | 0.0171 |
| Error            | 513590.8 | 154   | 3335     |      |        |
| Total            | 666562   | 163   |          |      |        |

| ANOVA (ff vs bf) |          |       |          |       |        |
|------------------|----------|-------|----------|-------|--------|
| Source           | Sum Sq.  | d. f. | Mean Sq. | F     | Prob>F |
| Fert.            | 122918   | 4     | 30729.5  | 10.22 | 0      |
| Dir.             | 12438.6  | 1     | 12438.6  | 4.14  | 0.0442 |
| Fert.:Dir.       | 202991.9 | 4     | 50748    | 16.88 | 0      |
| Error            | 345699.7 | 115   | 3006.1   |       |        |
| Total            | 640589.6 | 124   |          |       |        |

| ANOVA (fb vs bb) |          |       |          |      |        |
|------------------|----------|-------|----------|------|--------|
| Source           | Sum Sq.  | d. f. | Mean Sq. | F    | Prob>F |
| Fert.            | 39176.2  | 4     | 9794     | 3.58 | 0.0087 |
| Dir.             | 18397.5  | 1     | 18397.5  | 6.72 | 0.0108 |
| Fert.:Dir.       | 50228    | 4     | 12557    | 4.58 | 0.0018 |
| Error            | 314996.8 | 115   | 2739.1   |      |        |
| Total            | 407482.4 | 124   |          |      |        |

| ANOVA (fb vs bf) |          |       |          |       |        |
|------------------|----------|-------|----------|-------|--------|
| Source           | Sum Sq.  | d. f. | Mean Sq. | F     | Prob>F |
| Fert.            | 36392.7  | 4     | 9098.2   | 4.7   | 0.0019 |
| Dir.             | 16176.2  | 1     | 16176.2  | 8.36  | 0.005  |
| Fert.:Dir.       | 184027.5 | 4     | 46006.9  | 23.77 | 0      |
| Error            | 147105.7 | 76    | 1935.6   |       |        |
| Total            | 439765.3 | 85    |          |       |        |

Figure A5: ANOVA tables for nitrate leaching data.

| ANOVA (all)        |         |       |          |       |        |
|--------------------|---------|-------|----------|-------|--------|
| Source             | Sum Sq. | d. f. | Mean Sq. | F     | Prob>F |
| Fert.              | 1195    | 4     | 298.76   | 7.6   | 0      |
| St. dir.           | 120.2   | 1     | 120.25   | 3.06  | 0.0815 |
| Cur. dir.          | 16.1    | 1     | 16.08    | 0.41  | 0.5229 |
| Fert.:St. dir.     | 3242.1  | 4     | 810.53   | 20.63 | 0      |
| Fert.:Cur. dir.    | 10715.1 | 4     | 2678.76  | 68.19 | 0      |
| St. dir.:Cur. dir. | 111.2   | 1     | 111.2    | 2.83  | 0.0938 |
| Error              | 9193    | 234   | 39.29    |       |        |
| Total              | 31709.6 | 249   |          |       |        |

  

| ANOVA (starting forward - ff vs fb) |         |       |          |       |        |
|-------------------------------------|---------|-------|----------|-------|--------|
| Source                              | Sum Sq. | d. f. | Mean Sq. | F     | Prob>F |
| Fert.                               | 2824.84 | 4     | 706.21   | 56.99 | 0      |
| Dir.                                | 37.32   | 1     | 37.32    | 3.01  | 0.0853 |
| Fert.:Dir.                          | 5234.13 | 4     | 1308.53  | 105.6 | 0      |
| Error                               | 1424.95 | 115   | 12.39    |       |        |
| Total                               | 14360   | 124   |          |       |        |

  

| ANOVA (starting backward - bf vs bb) |         |       |          |        |             |
|--------------------------------------|---------|-------|----------|--------|-------------|
| Source                               | Sum Sq. | d. f. | Mean Sq. | F      | Prob>F      |
| Fert.                                | 6674.8  | 4     | 1668.7   | 100.56 | 1.29658e-36 |
| Dir.                                 | 527.6   | 1     | 527.65   | 31.8   | 1.24192e-07 |
| Fert.:Dir.                           | 3867.7  | 4     | 966.93   | 58.27  | 8.71635e-27 |
| Error                                | 1908.3  | 115   | 16.59    |        |             |
| Total                                | 17247.2 | 124   |          |        |             |

  

| ANOVA (ff vs bb) |         |       |          |        |        |
|------------------|---------|-------|----------|--------|--------|
| Source           | Sum Sq. | d. f. | Mean Sq. | F      | Prob>F |
| Fert.            | 4156.7  | 4     | 1039.18  | 70.65  | 0      |
| Dir.             | 135     | 1     | 134.95   | 9.18   | 0.0029 |
| Fert.:Dir.       | 13742.4 | 4     | 3435.59  | 233.57 | 0      |
| Error            | 2265.2  | 154   | 14.71    |        |        |
| Total            | 23229.5 | 163   |          |        |        |

  

| ANOVA (ff vs bf) |         |       |          |        |        |
|------------------|---------|-------|----------|--------|--------|
| Source           | Sum Sq. | d. f. | Mean Sq. | F      | Prob>F |
| Fert.            | 2990.8  | 4     | 747.7    | 55.92  | 0      |
| Dir.             | 183     | 1     | 183.02   | 13.69  | 0.0003 |
| Fert.:Dir.       | 8586.3  | 4     | 2146.58  | 160.53 | 0      |
| Error            | 1537.8  | 115   | 13.37    |        |        |
| Total            | 15819.2 | 124   |          |        |        |

  

| ANOVA (fb vs bb) |         |       |          |        |        |
|------------------|---------|-------|----------|--------|--------|
| Source           | Sum Sq. | d. f. | Mean Sq. | F      | Prob>F |
| Fert.            | 2020.4  | 4     | 505.09   | 32.35  | 0      |
| Dir.             | 241.8   | 1     | 241.84   | 15.49  | 0.0001 |
| Fert.:Dir.       | 7988.5  | 4     | 1997.12  | 127.92 | 0      |
| Error            | 1795.5  | 115   | 15.61    |        |        |
| Total            | 15433.4 | 124   |          |        |        |

  

| ANOVA (fb vs bf) |         |       |          |       |        |
|------------------|---------|-------|----------|-------|--------|
| Source           | Sum Sq. | d. f. | Mean Sq. | F     | Prob>F |
| Fert.            | 2898.07 | 4     | 724.517  | 51.55 | 0      |
| Dir.             | 41.1    | 1     | 41.101   | 2.92  | 0.0913 |
| Fert.:Dir.       | 2854.31 | 4     | 713.577  | 50.77 | 0      |
| Error            | 1068.11 | 76    | 14.054   |       |        |
| Total            | 6806.85 | 85    |          |       |        |

Figure A6: ANOVA tables for germinations data.

| ANOVA (all)        |         |       |          |       |        |
|--------------------|---------|-------|----------|-------|--------|
| Source             | Sum Sq. | d. f. | Mean Sq. | F     | Prob>F |
| Fert.              | 74.78   | 4     | 18.6952  | 5.83  | 0.0002 |
| St. dir.           | 3.1     | 1     | 3.101    | 0.97  | 0.3262 |
| Cur. dir.          | 62.53   | 1     | 62.5348  | 19.52 | 0      |
| Fert.:St. dir.     | 168.03  | 4     | 42.0063  | 13.11 | 0      |
| Fert.:Cur. dir.    | 38.79   | 4     | 9.6965   | 3.03  | 0.0185 |
| St. dir.:Cur. dir. | 0       | 1     | 0.0006   | 0     | 0.989  |
| Error              | 749.78  | 234   | 3.2042   |       |        |
| Total              | 1093.34 | 249   |          |       |        |

| ANOVA (starting forward - ff vs fb) |         |       |          |       |        |
|-------------------------------------|---------|-------|----------|-------|--------|
| Source                              | Sum Sq. | d. f. | Mean Sq. | F     | Prob>F |
| Fert.                               | 61.65   | 4     | 15.4125  | 6.43  | 0.0001 |
| Dir.                                | 5.519   | 1     | 5.5188   | 2.3   | 0.1318 |
| Fert.:Dir.                          | 288.072 | 4     | 72.018   | 30.06 | 0      |
| Error                               | 275.482 | 115   | 2.3955   |       |        |
| Total                               | 629.2   | 124   |          |       |        |

| ANOVA (starting backward - bf vs bb) |         |       |          |      |        |
|--------------------------------------|---------|-------|----------|------|--------|
| Source                               | Sum Sq. | d. f. | Mean Sq. | F    | Prob>F |
| Fert.                                | 36.131  | 4     | 9.0327   | 3.75 | 0.0067 |
| Dir.                                 | 0.101   | 1     | 0.1008   | 0.04 | 0.8384 |
| Fert.:Dir.                           | 76.921  | 4     | 19.2302  | 7.97 | 0      |
| Error                                | 277.327 | 115   | 2.4115   |      |        |
| Total                                | 387.968 | 124   |          |      |        |

| ANOVA (ff vs bb) |         |       |          |       |             |
|------------------|---------|-------|----------|-------|-------------|
| Source           | Sum Sq. | d. f. | Mean Sq. | F     | Prob>F      |
| Fert.            | 212.078 | 4     | 53.0196  | 20.41 | 1.64779e-13 |
| Dir.             | 69.677  | 1     | 69.6767  | 26.82 | 6.87545e-07 |
| Fert.:Dir.       | 199.836 | 4     | 49.9591  | 19.23 | 7.51768e-13 |
| Error            | 400.009 | 154   | 2.5975   |       |             |
| Total            | 796.049 | 163   |          |       |             |

| ANOVA (ff vs bf) |         |       |          |       |             |
|------------------|---------|-------|----------|-------|-------------|
| Source           | Sum Sq. | d. f. | Mean Sq. | F     | Prob>F      |
| Fert.            | 82.361  | 4     | 20.5902  | 8.05  | 9.25134e-06 |
| Dir.             | 50.439  | 1     | 50.4392  | 19.73 | 2.06395e-05 |
| Fert.:Dir.       | 128.525 | 4     | 32.1312  | 12.57 | 1.6259e-08  |
| Error            | 294.027 | 115   | 2.5568   |       |             |
| Total            | 630.768 | 124   |          |       |             |

| ANOVA (fb vs bb) |         |       |          |       |        |
|------------------|---------|-------|----------|-------|--------|
| Source           | Sum Sq. | d. f. | Mean Sq. | F     | Prob>F |
| Fert.            | 60.048  | 4     | 15.0121  | 6.67  | 0.0001 |
| Dir.             | 19.673  | 1     | 19.6726  | 8.74  | 0.0038 |
| Fert.:Dir.       | 107.228 | 4     | 26.8071  | 11.91 | 0      |
| Error            | 258.782 | 115   | 2.2503   |       |        |
| Total            | 447.2   | 124   |          |       |        |

| ANOVA (fb vs bf) |         |       |          |      |        |
|------------------|---------|-------|----------|------|--------|
| Source           | Sum Sq. | d. f. | Mean Sq. | F    | Prob>F |
| Fert.            | 59.67   | 4     | 14.9175  | 7.42 | 0      |
| Dir.             | 16.866  | 1     | 16.8658  | 8.39 | 0.0049 |
| Fert.:Dir.       | 45.949  | 4     | 11.4873  | 5.71 | 0.0004 |
| Error            | 152.8   | 76    | 2.0105   |      |        |
| Total            | 295.209 | 85    |          |      |        |

Figure A7: ANOVA tables for diseased seeds data.

| ANOVA (all)        |           |       |          |        |        |
|--------------------|-----------|-------|----------|--------|--------|
| Source             | Sum Sq.   | d. f. | Mean Sq. | F      | Prob>F |
| Fert.              | 86539.7   | 4     | 21634.9  | 4.15   | 0.0029 |
| St. dir.           | 19391.4   | 1     | 19391.4  | 3.72   | 0.0549 |
| Cur. dir.          | 58113.4   | 1     | 58113.4  | 11.15  | 0.001  |
| Fert.:St. dir.     | 528683.3  | 4     | 132170.8 | 25.36  | 0      |
| Fert.:Cur. dir.    | 214357.6  | 4     | 53589.4  | 10.28  | 0      |
| St. dir.:Cur. dir. | 995931.4  | 1     | 995931.4 | 191.13 | 0      |
| Error              | 1219328.4 | 234   | 5210.8   |        |        |
| Total              | 3120685.4 | 249   |          |        |        |

  

| ANOVA (starting forward - ff vs fb) |           |       |          |       |        |
|-------------------------------------|-----------|-------|----------|-------|--------|
| Source                              | Sum Sq.   | d. f. | Mean Sq. | F     | Prob>F |
| Fert.                               | 164384.7  | 4     | 41096.2  | 5.33  | 0.0006 |
| Dir.                                | 688610    | 1     | 688610   | 89.27 | 0      |
| Fert.:Dir.                          | 334937.3  | 4     | 83734.3  | 10.85 | 0      |
| Error                               | 887126.6  | 115   | 7714.1   |       |        |
| Total                               | 2033929.3 | 124   |          |       |        |

| ANOVA (starting backward - bf vs bb) |           |       |          |        |             |
|--------------------------------------|-----------|-------|----------|--------|-------------|
| Source                               | Sum Sq.   | d. f. | Mean Sq. | F      | Prob>F      |
| Fert.                                | 167874.1  | 4     | 41968.5  | 18.61  | 8.13663e-12 |
| Dir.                                 | 355612.6  | 1     | 355612.6 | 157.65 | 2.68807e-23 |
| Fert.:Dir.                           | 266546.6  | 4     | 66636.7  | 29.54  | 6.73496e-17 |
| Error                                | 259401.1  | 115   | 2255.7   |        |             |
| Total                                | 1046230.1 | 124   |          |        |             |

  

| ANOVA (ff vs bb) |          |       |          |      |        |
|------------------|----------|-------|----------|------|--------|
| Source           | Sum Sq.  | d. f. | Mean Sq. | F    | Prob>F |
| Fert.            | 97140.9  | 4     | 24285.2  | 9.95 | 0      |
| Dir.             | 11504.5  | 1     | 11504.5  | 4.71 | 0.0314 |
| Fert.:Dir.       | 84230.2  | 4     | 21057.6  | 8.63 | 0      |
| Error            | 375793.7 | 154   | 2440.2   |      |        |
| Total            | 602433.6 | 163   |          |      |        |

| ANOVA (ff vs bf) |           |       |          |       |             |
|------------------|-----------|-------|----------|-------|-------------|
| Source           | Sum Sq.   | d. f. | Mean Sq. | F     | Prob>F      |
| Fert.            | 359365.5  | 4     | 89841.4  | 23.99 | 1.91761e-14 |
| Dir.             | 259237    | 1     | 259237   | 69.22 | 2.04324e-13 |
| Fert.:Dir.       | 159633.4  | 4     | 39908.3  | 10.66 | 2.21529e-07 |
| Error            | 430680.5  | 115   | 3745     |       |             |
| Total            | 1178379.3 | 124   |          |       |             |

  

| ANOVA (fb vs bb) |          |       |          |        |        |
|------------------|----------|-------|----------|--------|--------|
| Source           | Sum Sq.  | d. f. | Mean Sq. | F      | Prob>F |
| Fert.            | 415926.2 | 4     | 103981.6 | 16.7   | 0      |
| Dir.             | 840897.5 | 1     | 840897.5 | 135.09 | 0      |
| Fert.:Dir.       | 127524.9 | 4     | 31881.2  | 5.12   | 0.0008 |
| Error            | 715847.3 | 115   | 6224.8   |        |        |
| Total            | 1936933  | 124   |          |        |        |

| ANOVA (fb vs bf) |           |       |          |       |        |
|------------------|-----------|-------|----------|-------|--------|
| Source           | Sum Sq.   | d. f. | Mean Sq. | F     | Prob>F |
| Fert.            | 62199.5   | 4     | 15549.9  | 1.53  | 0.201  |
| Dir.             | 76775.5   | 1     | 76775.5  | 7.57  | 0.0074 |
| Fert.:Dir.       | 530695.5  | 4     | 132673.9 | 13.08 | 0      |
| Error            | 770734.1  | 76    | 10141.2  |       |        |
| Total            | 1516692.5 | 85    |          |       |        |

Figure A8: ANOVA tables for water leaching data.

| ANOVA (all)        |         |       |          |       |        |
|--------------------|---------|-------|----------|-------|--------|
| Source             | Sum Sq. | d. f. | Mean Sq. | F     | Prob>F |
| Fert.              | 36.444  | 4     | 9.11103  | 26.38 | 0      |
| St. dir.           | 2.036   | 1     | 2.03589  | 5.89  | 0.0159 |
| Cur. dir.          | 0.046   | 1     | 0.04629  | 0.13  | 0.7146 |
| Fert.:St. dir.     | 39.007  | 4     | 9.7517   | 28.24 | 0      |
| Fert.:Cur. dir.    | 24.16   | 4     | 6.03999  | 17.49 | 0      |
| St. dir.:Cur. dir. | 2.173   | 1     | 2.17331  | 6.29  | 0.0128 |
| Error              | 80.818  | 234   | 0.34537  |       |        |
| Total              | 214.872 | 249   |          |       |        |

  

| ANOVA (starting forward - ff vs fb) |         |       |          |       |        |
|-------------------------------------|---------|-------|----------|-------|--------|
| Source                              | Sum Sq. | d. f. | Mean Sq. | F     | Prob>F |
| Fert.                               | 13.9644 | 4     | 3.4911   | 25.22 | 0      |
| Dir.                                | 0.3789  | 1     | 0.3789   | 2.74  | 0.1007 |
| Fert.:Dir.                          | 40.3824 | 4     | 10.0956  | 72.94 | 0      |
| Error                               | 15.9172 | 115   | 0.1384   |       |        |
| Total                               | 91.1799 | 124   |          |       |        |

  

| ANOVA (starting backward - bf vs bb) |         |       |          |       |             |
|--------------------------------------|---------|-------|----------|-------|-------------|
| Source                               | Sum Sq. | d. f. | Mean Sq. | F     | Prob>F      |
| Fert.                                | 37.86   | 4     | 9.4649   | 60.6  | 1.93382e-27 |
| Dir.                                 | 7.163   | 1     | 7.1635   | 45.86 | 5.66463e-10 |
| Fert.:Dir.                           | 45.563  | 4     | 11.3907  | 72.93 | 1.20811e-30 |
| Error                                | 17.962  | 115   | 0.1562   |       |             |
| Total                                | 123.403 | 124   |          |       |             |

  

| ANOVA (ff vs bb) |         |       |          |        |        |
|------------------|---------|-------|----------|--------|--------|
| Source           | Sum Sq. | d. f. | Mean Sq. | F      | Prob>F |
| Fert.            | 75.077  | 4     | 18.7693  | 130.12 | 0      |
| Dir.             | 1.842   | 1     | 1.8423   | 12.77  | 0.0005 |
| Fert.:Dir.       | 53.605  | 4     | 13.4014  | 92.91  | 0      |
| Error            | 22.214  | 154   | 0.1442   |        |        |
| Total            | 161.727 | 163   |          |        |        |

  

| ANOVA (ff vs bf) |         |       |          |       |             |
|------------------|---------|-------|----------|-------|-------------|
| Source           | Sum Sq. | d. f. | Mean Sq. | F     | Prob>F      |
| Fert.            | 46.615  | 4     | 11.6538  | 90.04 | 1.6674e-34  |
| Dir.             | 2.475   | 1     | 2.4751   | 19.12 | 2.70633e-05 |
| Fert.:Dir.       | 35.487  | 4     | 8.8718   | 68.54 | 1.4974e-29  |
| Error            | 14.885  | 115   | 0.1294   |       |             |
| Total            | 109.78  | 124   |          |       |             |

  

| ANOVA (fb vs bb) |         |       |          |       |             |
|------------------|---------|-------|----------|-------|-------------|
| Source           | Sum Sq. | d. f. | Mean Sq. | F     | Prob>F      |
| Fert.            | 27.15   | 4     | 6.78754  | 41.09 | 2.37616e-21 |
| Dir.             | 2.954   | 1     | 2.95411  | 17.89 | 4.73158e-05 |
| Fert.:Dir.       | 35.611  | 4     | 8.90275  | 53.9  | 1.64138e-25 |
| Error            | 18.994  | 115   | 0.16517  |       |             |
| Total            | 102.753 | 124   |          |       |             |

  

| ANOVA (fb vs bf) |         |       |          |       |        |
|------------------|---------|-------|----------|-------|--------|
| Source           | Sum Sq. | d. f. | Mean Sq. | F     | Prob>F |
| Fert.            | 8.3054  | 4     | 2.07634  | 13.53 | 0      |
| Dir.             | 0.6848  | 1     | 0.68481  | 4.46  | 0.038  |
| Fert.:Dir.       | 33.6709 | 4     | 8.41772  | 54.84 | 0      |
| Error            | 11.6654 | 76    | 0.15349  |       |        |
| Total            | 49.3775 | 85    |          |       |        |

Figure A9: ANOVA tables for dry weight data.

26 **A4: Results for germination, disease incidence, water**  
 27 **flux and yield**

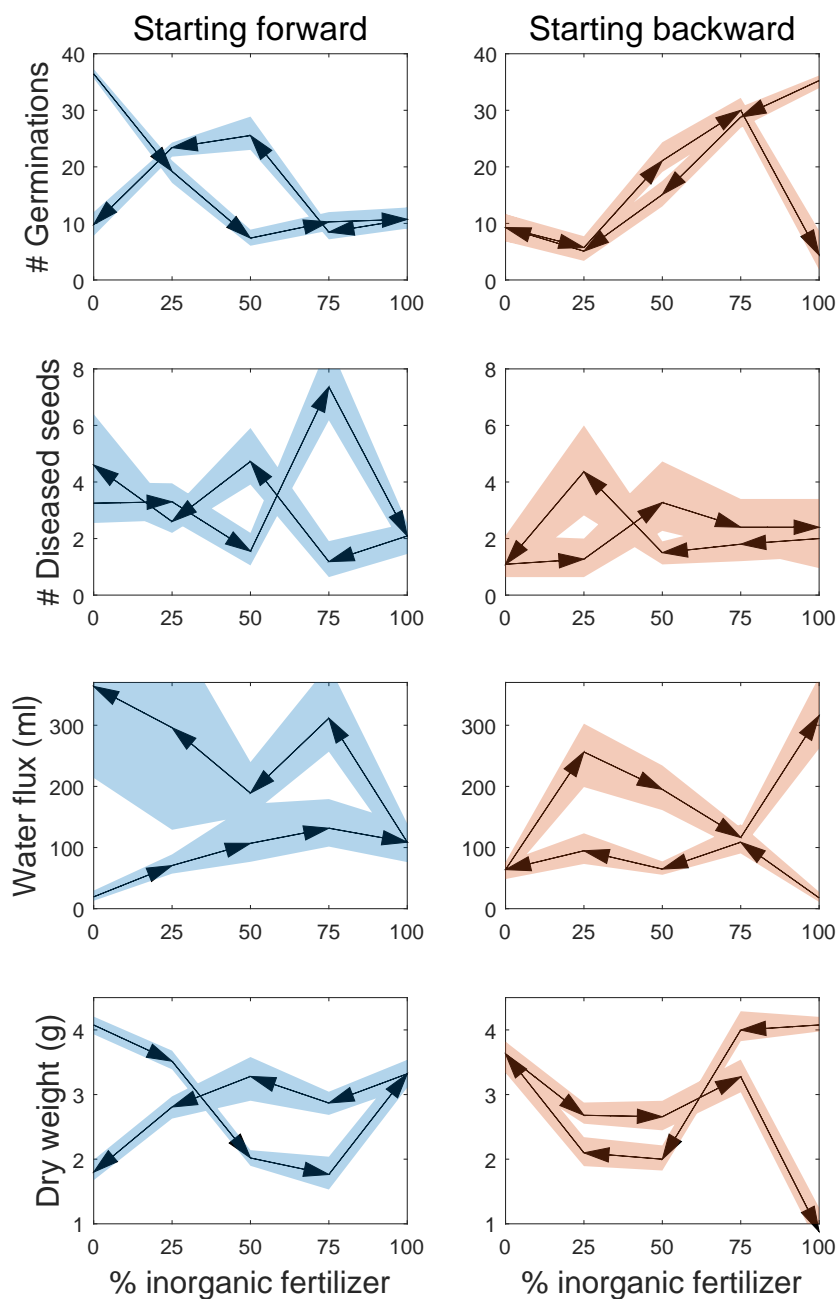

Figure A10: Complex dynamics in greenhouse experiments.
